# Supplementary material for: Genetic and Phenotypic Comparison of Facultative Methylotrophy between Methylobacterium extorquens Strains PA1 and AM1
Source: PubMed Central journal article supplement (PMC4169470; doi:10.1371/journal.pone.0107887), 2014-09-18

**Figure S3:** Growth curves of three replicates of the  $\Delta cel$  strain of PA1 (WT) (in green), the  $\Delta mxa$  mutant of WT (in red), and the  $\Delta glyA$  mutant of WT (in blue) on a combination of 7.5 mM methanol and 1.75 mM succinate as seen in the open-source growth curve fitter software, Curve Fitter.

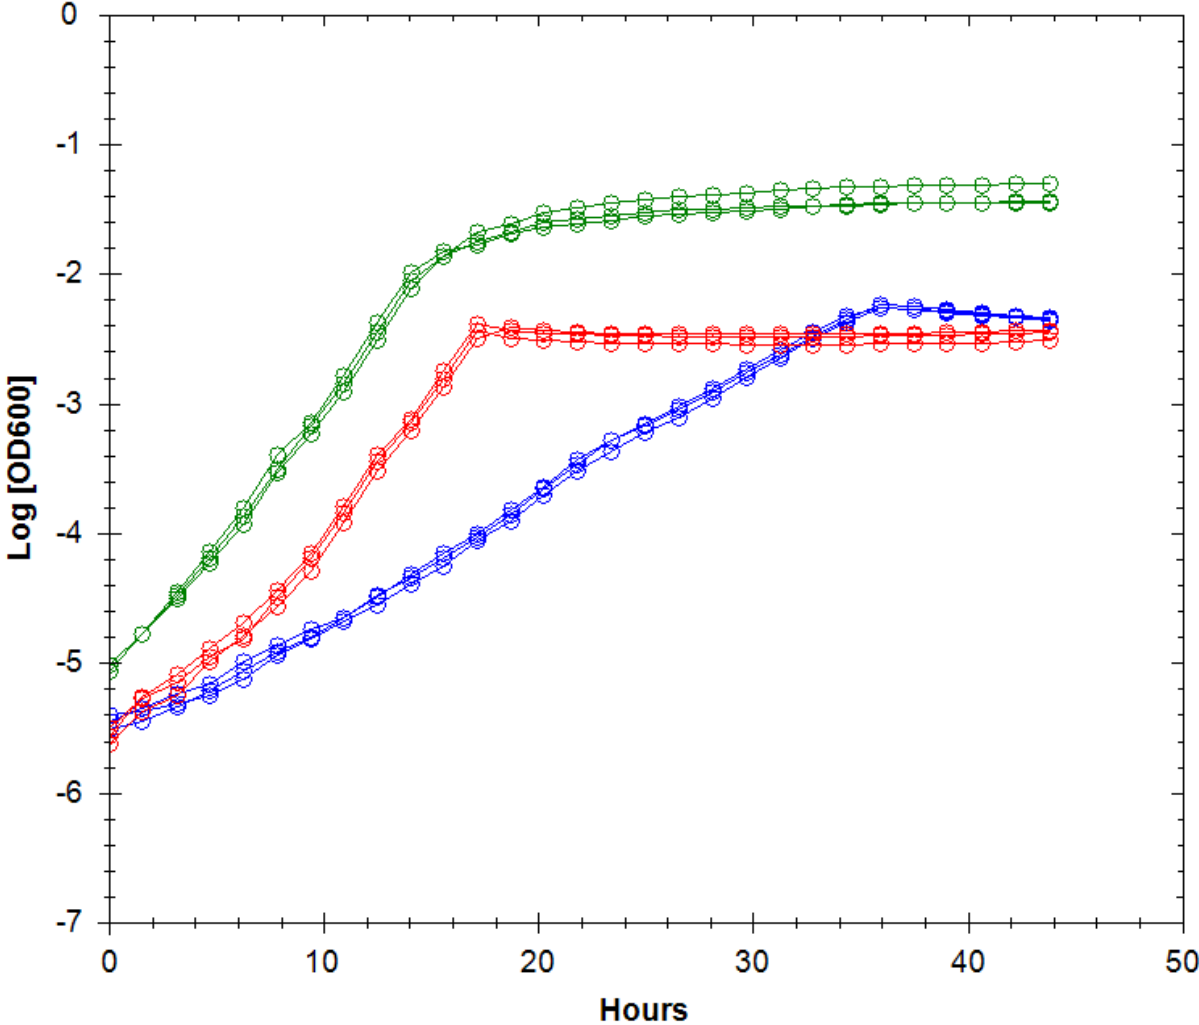

Supplement: pone.0107887.s003.pdf [file pone.0107887.s003.pdf]
