# Supplementary material for: Genetic and Phenotypic Comparison of Facultative Methylotrophy between Methylobacterium extorquens Strains PA1 and AM1
Source: PubMed Central journal article supplement (PMC4169470; doi:10.1371/journal.pone.0107887), 2014-09-18
Supplement: pone.0107887.s006.pdf [file pone.0107887.s006.pdf]

**Table S3:** Mean growth rates (in  $h^{-1}$ ) and the standard error of the mean growth rates on  $C_1$  substrates M (15 mM methanol), MA (15 mM methylamine), F (15 mM formate) for AM1 and PA1 (both lacking the *cel* locus), as well as the mutants strains of  $\Delta cel$  PA1.

| Strains       | M ( $h^{-1}$ ) | MA ( $h^{-1}$ ) | F ( $h^{-1}$ ) |
|---------------|----------------|-----------------|----------------|
| AM1           | 0.191±0.001    | 0.214±0.002     | 0.126±0.002    |
| PA1           | 0.210±0.001    | 0               | 0.150±0.004    |
| $\Delta fae$  | 0              | 0               | 0.163±0.004    |
| $\Delta ftjL$ | 0              | 0               | 0              |
| $\Delta glyA$ | 0              | 0               | 0              |
| $\Delta mptG$ | 0              | 0               | 0.161±0.002    |
| $\Delta mxa$  | 0              | 0               | 0.139±0.002    |
| $\Delta hprA$ | 0              | 0               | 0              |
