# Supplementary material for: Genetic and Phenotypic Comparison of Facultative Methylotrophy between Methylobacterium extorquens Strains PA1 and AM1
Source: PubMed Central journal article supplement (PMC4169470; doi:10.1371/journal.pone.0107887), 2014-09-18
Supplement: pone.0107887.s007.pdf [file pone.0107887.s007.pdf]

**Table S4:** Mean growth rates (in  $h^{-1}$ ) and the standard error of the mean growth rates on multi-C substrates S (3.5 mM succinate), P (5 mM pyruvate), E (7.5 mM ethanol) for AM1 and PA1 (both lacking the *cel* locus), as well as the mutants strains of  $\Delta cel$  PA1.

| Strains       | S ( $h^{-1}$ ) | P ( $h^{-1}$ ) | E ( $h^{-1}$ ) |
|---------------|----------------|----------------|----------------|
| AM1           | 0.202±0.001    | 0.141±0.001    | 0              |
| PA1           | 0.213±0.002    | 0.192±0.002    | 0.158±0.001    |
| $\Delta fae$  | 0.212±0.001    | 0.178±0.002    | 0.166±0.001    |
| $\Delta ftfL$ | 0.217±0.001    | 0.184±0.003    | 0.158±0.001    |
| $\Delta glyA$ | 0.194±0.002    | 0              | 0              |
| $\Delta mptG$ | 0.184±0.002    | 0.144±0.003    | 0.155±0.001    |
| $\Delta mxa$  | 0.213±0.002    | 0.185±0.001    | 0              |
| $\Delta hprA$ | 0.203±0.001    | 0.192±0.001    | 0.160±0.001    |
