# Supplementary material for: Genetic and Phenotypic Comparison of Facultative Methylotrophy between Methylobacterium extorquens Strains PA1 and AM1
Source: PubMed Central journal article supplement (PMC4169470; doi:10.1371/journal.pone.0107887), 2014-09-18
Supplement: pone.0107887.s010.pdf [file pone.0107887.s010.pdf]

**Table S7:** Mean max OD<sub>600</sub> and the standard error of the max OD<sub>600</sub> on multi-C substrates S (3.5 mM succinate), P (5 mM pyruvate), E (7.5 mM ethanol) for AM1 and PA1 (both lacking the *cel* locus), as well as the mutants strains of  $\Delta cel$  PA1.

| Strains       | S (h <sup>-1</sup> ) | P (h <sup>-1</sup> ) | E (h <sup>-1</sup> ) |
|---------------|----------------------|----------------------|----------------------|
| AM1           | 0.162±0.002          | 0.188±0.002          | 0.012±0.001          |
| PA1           | 0.182±0.003          | 0.231±0.002          | 0.252±0.003          |
| $\Delta fae$  | 0.189±0.001          | 0.232±0.001          | 0.245±0.011          |
| $\Delta fitL$ | 0.180±0.004          | 0.229±0.001          | 0.208±0.009          |
| $\Delta glyA$ | 0.178±0.006          | 0.048±0.001          | 0                    |
| $\Delta mptG$ | 0.194±0.001          | 0.230±0.001          | 0.259±0.008          |
| $\Delta mxa$  | 0.177±0.006          | 0.226±0.002          | 0.022±0.002          |
| $\Delta hprA$ | 0.190±0.002          | 0.233±0.002          | 0.202±0.015          |
