# Supplementary material for: Genetic and Phenotypic Comparison of Facultative Methylotrophy between Methylobacterium extorquens Strains PA1 and AM1
Source: PubMed Central journal article supplement (PMC4169470; doi:10.1371/journal.pone.0107887), 2014-09-18
Supplement: pone.0107887.s012.pdf [file pone.0107887.s012.pdf]

**Table S9:** List of primers used for deleting methylotrophy-specific genes in *M. extorquens* PA1.

| Primer               | Primer Sequence                                                          | Primer Description                                                                            |
|----------------------|--------------------------------------------------------------------------|-----------------------------------------------------------------------------------------------|
| $\Delta fae\_us\_f$  | ATGGATGCATATGCTGCAGCTCGAGCGGC<br>CGCCGACGTGTCCCAAACCGATG                 | Gibson forward linker with NotI and 24 bp of pCM433 backbone at 5' end. Product size = 695 bp |
| $\Delta fae\_us\_r$  | GTCCAAGGAAGATCGAAGCCAGTCGCTG<br>GA GGTCTCTCCCTGGATTCCTG                  | 30 bp of ds region linker at 5'end. Product size = 695 bp                                     |
| $\Delta fae\_ds\_f$  | TCCAGCGACTGGCTTCGATC                                                     | Product size = 424 bp                                                                         |
| $\Delta fae\_ds\_r$  | GGTTAACACGCGTACGTAGGGCCCCGCGGC<br>CGC CAGCGAGAGCCAGCTTGATG               | Gibson reverse linker with NotI and 24 bp of pCM433 backbone at 5' end. Product size = 424 bp |
| $\Delta ftfL\_us\_f$ | GTC CCT ATG CTT CCG TGG TAG C                                            | Product size = 617 bp                                                                         |
| $\Delta ftfL\_us\_r$ | GGTTAACACGCGTACGTAGGGCCCCGCGGC<br>CGC CGC AGA ACG TGT GGG TGA AAC G      | Gibson reverse linker with NotI and 24 bp of pCM433 backbone. Product size = 617 bp           |
| $\Delta ftfL\_ds\_f$ | ATGGATGCATATGCTGCAGCTCGAGCGGC<br>CGCCGA CAT GAC GCT GCA TCT CTC C        | 30 bp of us region linker at 5'end. Product size = 451 bp                                     |
| $\Delta ftfL\_ds\_r$ | TTCCGTTTCGCTACCACGGAAGCATAGGGA<br>CCCT GAC TTG GGC GGA TCG TTG           | Gibson forward linker with NotI and 24 bp of pCM433 backbone at 5' end. Product size = 451 bp |
| $\Delta mptG\_us\_f$ | ATGGATGCATATGCTGCAGCTCGAGCGGC<br>CGCGAT CTC GGC GAT CAG CTC ACC          | Gibson forward linker with NotI and 24 bp of pCM433 backbone at 5' end. Product size = 859 bp |
| $\Delta mptG\_us\_r$ | GCC GTT GAG ATC GAG GAA GCC                                              | Product size = 859 bp                                                                         |
| $\Delta mptG\_ds\_f$ | CTGCATTTCGGTTCTCGATCTCAACGGC<br>CTC GCA GAA GGA GGC GGA                  | Gibson forward linker from 2049230 to 2049259 on PA1 genome. Product size = 723 bp            |
| $\Delta mptG\_ds\_r$ | GGTTAACACGCGTACGTAGGGCCCCGCGGC<br>CGCGGT GAA GGC GAT CTT CGA GAC G       | Gibson reverse linker with NotI and 24 bp of pCM433 backbone at 5' end. Product size 723 bp   |
| $\Delta glyA\_us\_f$ | GAT CAG CTC GAT CTC GTG CTG CTG C                                        | Product size = 497 bp                                                                         |
| $\Delta glyA\_us\_r$ | GGTTAACACGCGTACGTAGGGCCCCGCGGC<br>CGCTGA CGC TTC CGA TCG CAC GTG         | Gibson Reverse Linker with NotI and 24 bp of pCM433 backbone at 5'end. Product size = 497 bp  |
| $\Delta glyA\_ds\_f$ | ATGGATGCATATGCTGCAGCTCGAGCGGC<br>CGCCGC GCA ACC TTC AGG TGA AGG<br>ATG G | Gibson forward linker with NotI and 24 bp of pCM433 backbone at 5'end. Product size = 526 bp  |
| $\Delta glyA\_ds\_r$ | GGT ACC GAC AAC CAC CTG ATG CTG G                                        | Product size = 526 bp                                                                         |
| $\Delta mxa\_us\_f$  | ATGGATGCATATGCTGCAGCTCGAGCGGC<br>CGCGAT CGA GGT GCA ACT CGG CAG          | Gibson forward linker with NotI and 24 bp of pCM433 backbone at 5' end. Product size = 701bp  |
| $\Delta mxa\_us\_r$  | TGG TCC AGA TCG CGG TCA AC                                               | Product size = 701bp                                                                          |
| $\Delta mxa\_ds\_f$  | CGTTGCGCCGGTTGACCGCGATCTGGACC<br>ATCG TGA TGC TGA ACG CGC AC             | Gibson linker with 4606355 through 4606384 on PA1 genome. Product size = 496bp                |
| $\Delta mxa\_ds\_r$  | GGTTAACACGCGTACGTAGGGCCCCGCGGC<br>CGCAAC TCG ATG TCG AAG GCG TGC         | Gibson reverse linker with NotI and 24 bp of pCM433 backbone at 5' end. Product size = 496bp  |
| $\Delta hprA\_us\_f$ | ATGGATGCATATGCTGCAGCTCGAGCGGC<br>CGCCTC ATC GAC AAC GGC GTG AAG G        | Gibson forward linker with NotI and 24 bp of pCM433 backbone at 5' end. Product size = 344bp  |
| $\Delta hprA\_us\_r$ | GGGCAATCGTGTCTCGCTCAC                                                    | Product size = 344bp                                                                          |
| $\Delta hprA\_ds\_f$ | GCAGGGGTTTTGTGAGCGACACGATTGCC<br>CCTCGTGGACAACGTCGAAGC                   | 30 bp from 2016078 to 2016107 on PA1 genome at 5' end. Product size = 447bp                   |
| $\Delta hprA\_ds\_r$ | GGTTAACACGCGTACGTAGGGCCCCGCGGC<br>CGCTCT CGA CCG CCT CGA ACA CC          | Gibson reverse linker with NotI and 24 bp of pCM433 backbone at 5' end. Product size = 447bp  |
| $\Delta fhc\_us\_f$  | ATGGATGCATATGCTGCAGCTCGAGCGGC<br>CGCCCG AGA TGC TTG AGG CTC TG           | Gibson forward linker with NotI and 24 bp of pCM433 backbone at 5' end. Product size = 480bp  |
| $\Delta fhc\_us\_r$  | GCT CTC GCA AGG CTC GAT CC                                               | Product size = 480bp                                                                          |
| $\Delta fhc\_ds\_f$  | CCCTCGACCCGGATCGAGCCTTGCGAGAG<br>CTCC GGG TCG TAG ACG ATG AC             | 30 bp from 2044769 to 2044798 on PA1 genome at 5' end. Product size = 569bp                   |
| $\Delta fhc\_ds\_r$  | GGTTAACACGCGTACGTAGGGCCCCGCGGC<br>CGCTGA GGA AGC ATG GCA GCC TG          | Gibson reverse linker with NotI and 24 bp of pCM433 backbone at 5' end. Product size = 569bp  |
